# Supplementary material for: Cardiovascular responses to physical activity during work and leisure
Source: HighWire-hosted journal article supplement (doi:10.1136/oemed-2021-107551), 2021-07-28
Supplement: oemed-2021-107551supp001_data_supplement.pdf [file oemed-2021-107551supp001_data_supplement.pdf]

**Supplemental Table 1 – Associations of daily physical activity and nocturnal HRV**

| <b>Steps</b>                                  |                |                      |                |                      |                        |
|-----------------------------------------------|----------------|----------------------|----------------|----------------------|------------------------|
|                                               | Workdays       |                      | Non-workdays   |                      | Interaction<br>P-value |
|                                               | $\beta$ (SE)   | P-value <sup>†</sup> | $\beta$ (SE)   | P-value <sup>†</sup> |                        |
| Average RR (ms)                               | -4.242 (1.676) | 0.016                | 3.711 (3.469)  | 0.285                | 0.887                  |
| RMSSD (log ms)                                | -0.016 (0.009) | 0.077                | -0.013 (0.017) | 0.429                | 0.907                  |
| SDNN (ms)                                     | -0.509 (0.232) | 0.029                | -0.458 (0.449) | 0.308                | 0.915                  |
| LF (log)                                      | -0.033 (0.014) | 0.024                | -0.024 (0.028) | 0.400                | 0.765                  |
| HF (log)                                      | -0.034 (0.017) | 0.045                | -0.026 (0.032) | 0.427                | 0.818                  |
| LF/HF ratio                                   | 0.009 (0.042)  | 0.829                | -0.034 (0.082) | 0.676                | 0.623                  |
| <b>Light physical activity</b>                |                |                      |                |                      |                        |
|                                               | Workdays       |                      | Non-workdays   |                      | Interaction<br>P-value |
|                                               | $\beta$ (SE)   | P-value <sup>†</sup> | $\beta$ (SE)   | P-value <sup>†</sup> |                        |
| Average RR (ms)                               | -3.313 (1.456) | 0.023                | -4.819 (2.294) | 0.036                | 0.587                  |
| RMSSD (log)                                   | -0.004 (0.007) | 0.593                | -0.009 (0.011) | 0.410                | 0.683                  |
| SDNN (ms)                                     | -0.042 (0.182) | 0.819                | -0.400 (0.284) | 0.159                | 0.285                  |
| LF (log)                                      | -0.011 (0.012) | 0.358                | -0.037 (0.019) | 0.046                | 0.232                  |
| HF (log)                                      | -0.015 (0.014) | 0.286                | -0.028 (0.022) | 0.204                | 0.619                  |
| LF/HF ratio                                   | 0.038 (0.035)  | 0.278                | -0.037 (0.055) | 0.501                | 0.247                  |
| <b>Moderate-to-vigorous physical activity</b> |                |                      |                |                      |                        |
|                                               | Workdays       |                      | Non-workdays   |                      | Interaction<br>P-value |
|                                               | $\beta$ (SE)   | P-value <sup>†</sup> | $\beta$ (SE)   | P-value <sup>†</sup> |                        |
| Average RR (ms)                               | -2.347 (1.728) | 0.174                | 0.986 (3.517)  | 0.779                | 0.385                  |
| RMSSD (log)                                   | -0.023 (0.009) | 0.006                | 0.006 (0.017)  | 0.734                | 0.121                  |
| SDNN (ms)                                     | -0.758 (0.216) | <0.001               | 0.788 (0.435)  | 0.070                | 0.001                  |
| LF (log)                                      | -0.031 (0.014) | 0.030                | 0.004 (0.029)  | 0.896                | 0.269                  |
| HF (log)                                      | -0.031 (0.016) | 0.061                | 0.020 (0.033)  | 0.553                | 0.163                  |
| LF/HF ratio                                   | -0.019 (0.042) | 0.653                | -0.014 (0.085) | 0.871                | 0.956                  |

\* presented as least squared means (SE); <sup>†</sup> p-values indicate the probability of the associated beta-coefficient being equal to zero; All coefficients represent a unit change in outcome per 10-minute change in activity; All models were adjusted for age, BMI, smoking status, fitness, and the presence or absence of the ambulatory blood pressure monitor; Abbreviations: HRV=heart rate variability,  $\beta$  (SE)=beta coefficient (standard error), RMSSD=root mean square successive difference, SDNN=standard deviation of the normal to normal RR intervals, LF=low frequency power, HF=high frequency power, LF/HF Ratio=low frequency to high frequency ratio, ms=milliseconds
